# Supplementary material for: Density Functional Theory Investigation of the NiO@Graphene Composite as a Urea Oxidation Catalyst in the Alkaline Electrolyte
Source: PubMed Central journal article supplement — ACS Omega. 2021 May 26;6(22):14648–54. doi: 10.1021/acsomega.1c01758 (PMC8260271; doi:10.1021/acsomega.1c01758), 2021-05-26
Supplement: ao1c01758_si_001.pdf [file ao1c01758_si_001.pdf]

## Supporting information

### DFT investigation of NiO@Graphene composite as urea oxidation catalyst in alkaline electrolyte

Shun Lu<sup>ab</sup>, Matthew Hummel<sup>b</sup>, Shuai Kang<sup>c</sup>, Rajesh Pathak<sup>d</sup>, Wei He<sup>e</sup>, Xueqiang Qi<sup>a\*</sup>, Zhengrong Gu<sup>b\*</sup>

a College of Chemistry and Chemical Engineering, Chongqing University of Technology, Chongqing, 400054, China

b Department of Agricultural and Biosystems Engineering, South Dakota State University, Brookings, SD, 57007, USA

c Micro-nano Manufacturing and System Integration Center, Chongqing Institute of Green and Intelligent Technology (CIGIT), Chinese Academy of Sciences, Chongqing, 400714, China

d Applied Materials Division, Argonne National Laboratory, 9700 Cass Ave, Lemont, IL 60439, USA

e Department of Electrical Engineering and Computer Science, South Dakota State University, Brookings, SD, 57007, USA

Corresponding authors: [Zhengrong.Gu@sdstate.edu](mailto:Zhengrong.Gu@sdstate.edu) (Z. Gu) and [xqqi@cqut.edu.cn](mailto:xqqi@cqut.edu.cn) (X. Qi)

Number of Figure: 5

Number of Table: 2

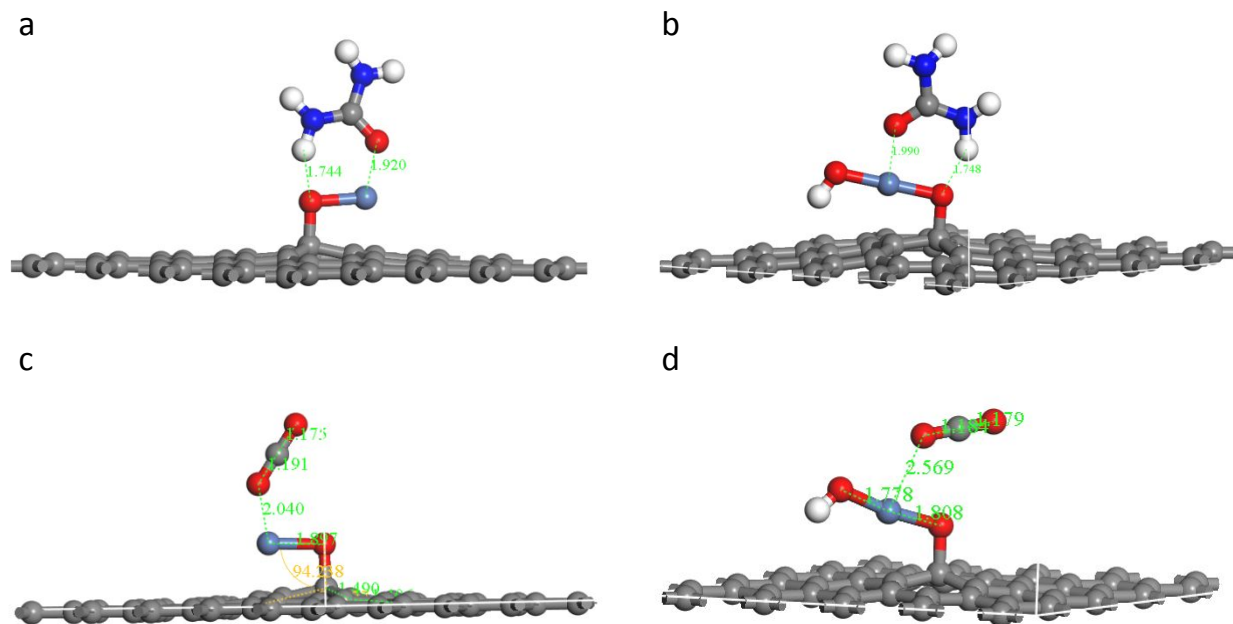

**Figure S1.** The shortest distance between urea and (a) NiO@Graphene, (b) NiOOH@Graphene, and (c) CO<sub>2</sub> and NiO@Graphene, (d) NiOOH@Graphene.

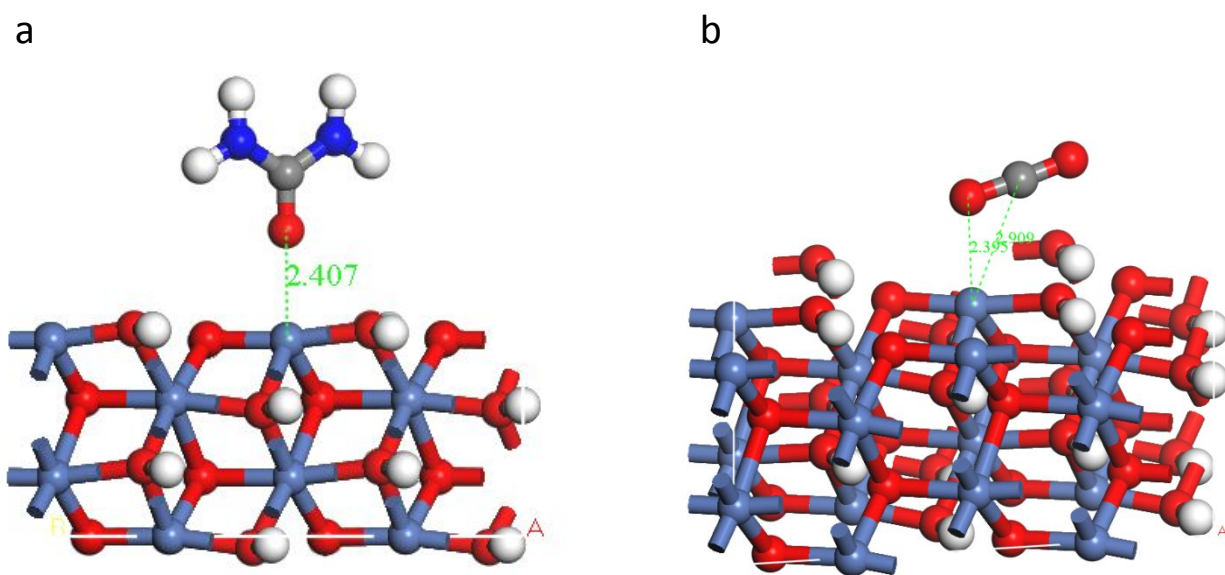

**Figure S2.** The shortest distance between (a) urea, (b) CO<sub>2</sub> and NiOOH.

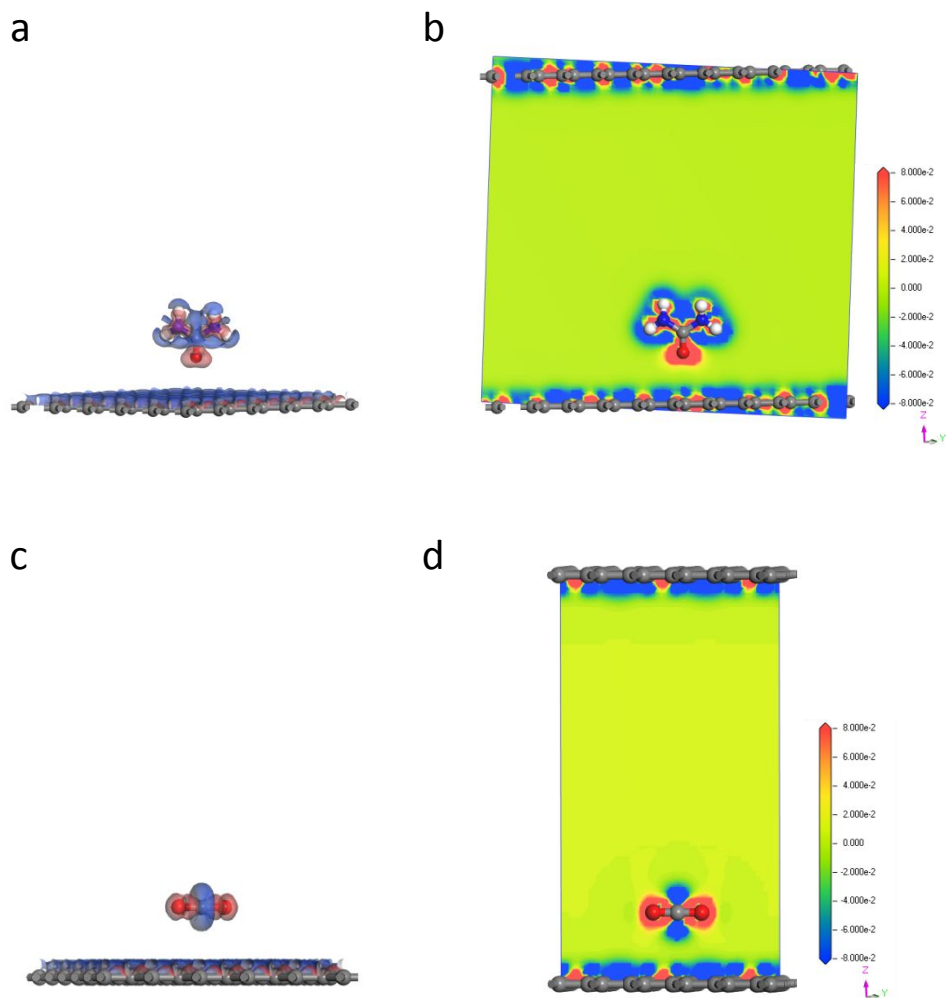

**Figure S3.** (a) The electron density difference of urea molecule adsorbed on the surface of Graphene. (b) Slice image of the adsorption of urea molecule on the surface of Graphene. (c) The electron density difference of CO<sub>2</sub> molecule adsorbed on the surface of Graphene. (d) Slice image of the adsorption of CO<sub>2</sub> molecule on the surface of Graphene. Note: (a, c) The red hooded face means enrichment of electrons while the blue means the deficiency of elections, (b, d) The contour around the atoms represents electron accumulation (red) or electron deletion (blue).

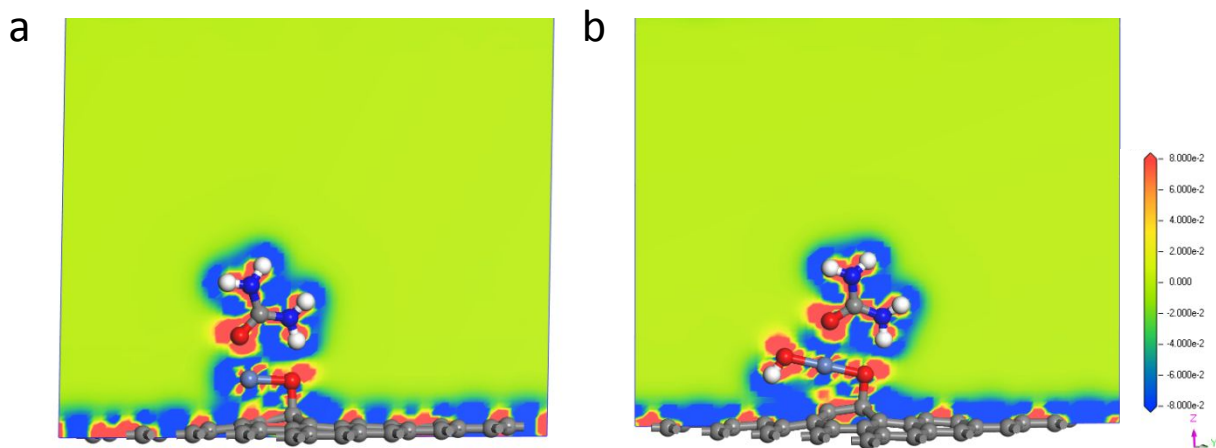

**Figure S4.** Slice images of the adsorption of urea molecule on the surface of (a) NiO@Graphene and (b) NiOOH@Graphene and the corresponding slice of the electron density difference. The contour around the atoms represents electron accumulation (red) or electron deletion (blue).

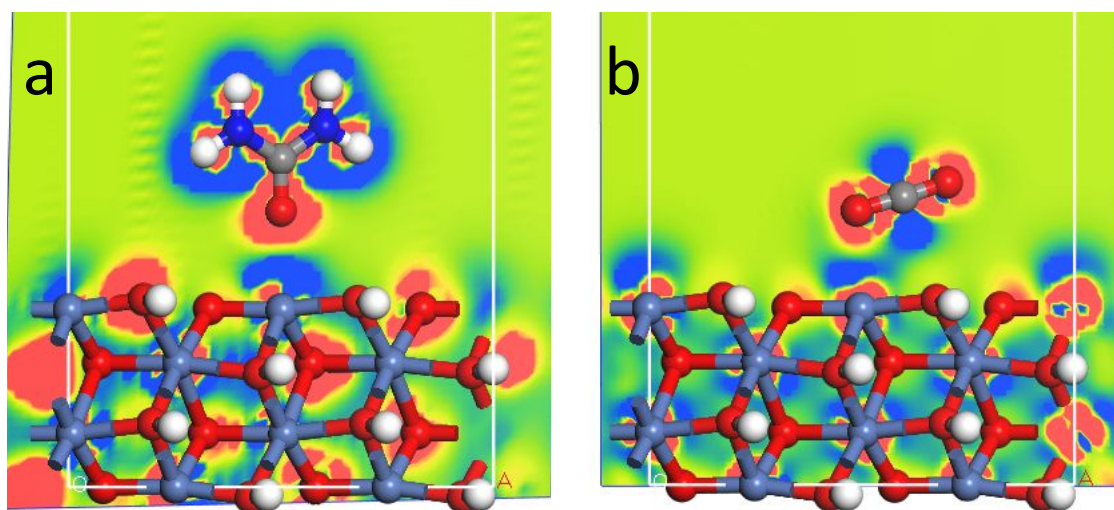

**Figure S5.** Slice images of the adsorption of (a) urea and (b) CO<sub>2</sub> molecule on the surface of NiOOH. The contour around the atoms represents electron accumulation (red) or electron deletion (blue).

**Table S1** Gibbs energies ( $\Delta G$ ) for the possible steps on M (M = NiOOH).<sup>1</sup>

| Reactions                                                                                                                                                                                      | $\Delta G/\text{kJ mol}^{-1}$ |
|------------------------------------------------------------------------------------------------------------------------------------------------------------------------------------------------|-------------------------------|
| $\text{CO}(\text{NH}_2)_2 + \text{M} \rightarrow [\text{M}\cdot\text{CO}(\text{NH}_2)_2]_{\text{ads}}$                                                                                         | 66.2                          |
| $[\text{M}\cdot\text{CO}(\text{NH}_2)_2]_{\text{ads}} + \text{OH}^- \rightarrow [\text{M}\cdot\text{CO}(\text{NH}_2\cdot\text{NH})]_{\text{ads}} + \text{H}_2\text{O} + \text{e}^-$            | -28.9                         |
| $[\text{M}\cdot\text{CO}(\text{NH}_2\cdot\text{NH})]_{\text{ads}} + \text{OH}^- \rightarrow [\text{M}\cdot\text{CO}(\text{NH}_2\cdot\text{N})]_{\text{ads}} + \text{H}_2\text{O} + \text{e}^-$ | -185.1                        |
| $[\text{M}\cdot\text{CO}(\text{NH}_2\cdot\text{N})]_{\text{ads}} + \text{OH}^- \rightarrow [\text{M}\cdot\text{CO}(\text{NH}\cdot\text{N})]_{\text{ads}} + \text{H}_2\text{O} + \text{e}^-$    | 75.4                          |
| $[\text{M}\cdot\text{CO}(\text{NH}\cdot\text{N})]_{\text{ads}} + \text{OH}^- \rightarrow [\text{M}\cdot\text{CO}(\text{N}\cdot\text{N})]_{\text{ads}} + \text{H}_2\text{O} + \text{e}^-$       | -178.2                        |
| $[\text{M}\cdot\text{CO}(\text{N}\cdot\text{N})]_{\text{ads}} + \text{OH}^- \rightarrow [\text{M}\cdot\text{CO}\cdot\text{OH}]_{\text{ads}} + \text{N}_2 + \text{e}^-$                         | 392.7                         |
| $[\text{M}\cdot\text{CO}\cdot\text{OH}]_{\text{ads}} + \text{OH}^- \rightarrow [\text{M}\cdot\text{CO}_2]_{\text{ads}} + \text{H}_2\text{O} + \text{e}^-$                                      | -156.6                        |
| $[\text{M}\cdot\text{CO}_2]_{\text{ads}} \rightarrow \text{M} + \text{CO}_2$                                                                                                                   | 1242.2                        |
| Total                                                                                                                                                                                          | 1227.7                        |

**Table S2** The optimized energy for the adsorption of  $\text{CO}_2$  and urea on the surface of NiO@Graphene and NiOOH@Graphene, respectively, based on our model.

| Species        | Optimized energy/eV |
|----------------|---------------------|
| $\text{CO}_2$  | -1028.03939         |
| Urea           | -2077.79804         |
| NiO@Graphene   | -9540.52016         |
| NiOOH@Graphene | -9994.29777         |

## Reference

1. Daramola, D. A.; Singh, D.; Botte, G. G., Dissociation rates of urea in the presence of NiOOH catalyst: a DFT analysis. *J. Phys. Chem. A* **2010**, *114* (43), 11513-11521.
